# Supplementary material for: Naturally acquired blocking human monoclonal antibodies to Plasmodiumvivax reticulocyte binding protein 2b
Source: PubMed Central journal article supplement (PMC7943553; doi:10.1038/s41467-021-21811-2), 2021-03-09
Supplement: 41467_2021_21811_MOESM1_ESM.pdf [file 41467_2021_21811_MOESM1_ESM.pdf]

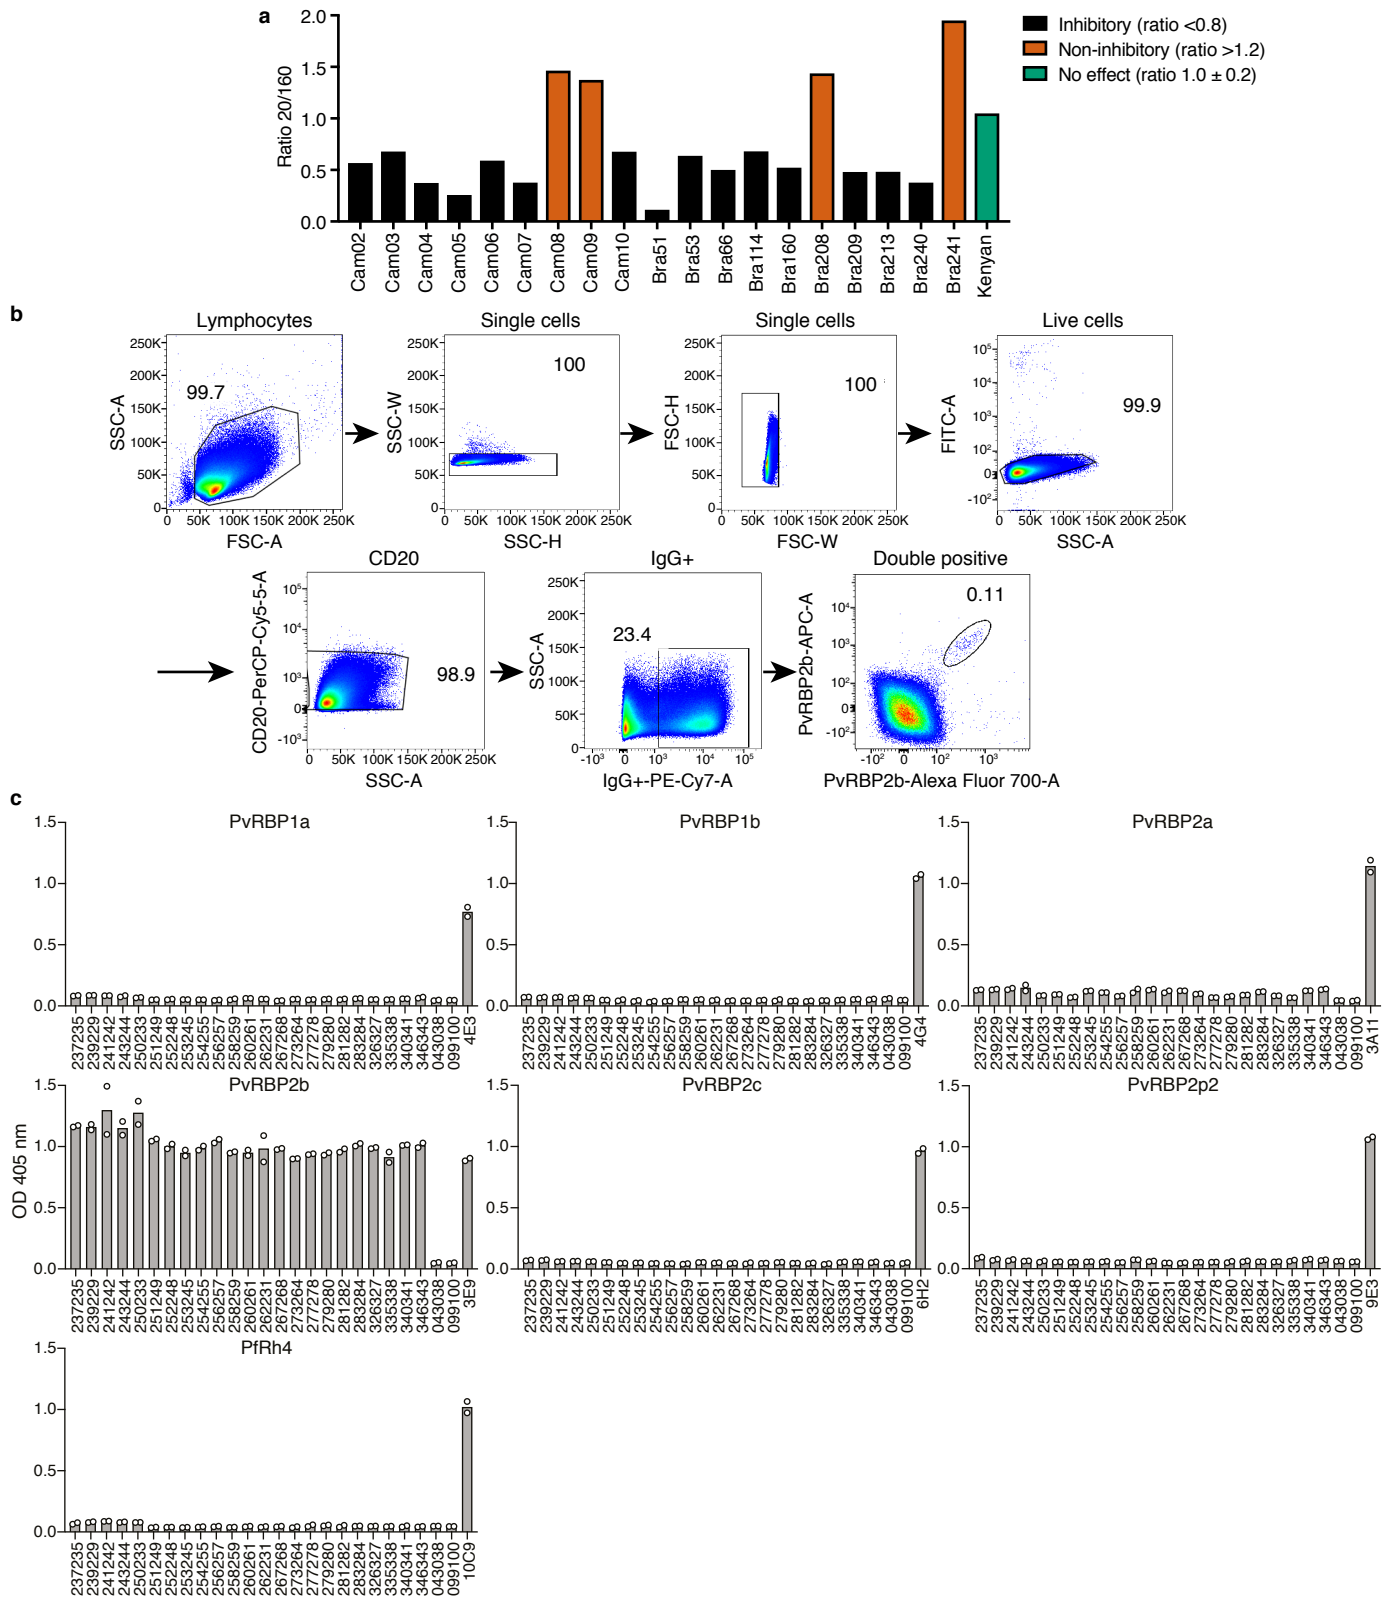

**Supplementary Figure S1. Functional blocking antibodies against PvrBP2b in serum and antibody specificity of PvrBP2b human mAbs using ELISA. (a)** PvrBP2b<sub>161-1454</sub> binding to reticulocytes in the presence of serum from Cambodian (Cam) and Brazilian (Bra) individuals and one Kenyan individual analyzed by flow cytometry. Binding results were expressed as a ratio between PvrBP2b<sub>161-1454</sub> binding at a 20-fold dilution of sera over a 160-fold dilution of sera, to account for non-specific increases in PvrBP2b<sub>161-1454</sub> binding in the presence of sera from individuals exposed to *P. vivax*. Black, ratio  $<0.8$  and inhibitory; Orange, ratio  $>1.2$  and non-inhibitory; Green,

ratio  $1.0 \pm 0.2$  and no effect. **(b)** Gating strategy for sorting PvrBP2b specific memory B cells. **(c)** Antibody specificity of PvrBP2b human mAbs to PvrBP family members and Pfrh4 using ELISA. Bar graphs represent the mean of duplicate measures represented as circles. Mouse mAbs 4E3, 4G4, 3A11, 3E9, 6H2, 9E3 and 10C9 were used to detect the coating of PvrBP1a, PvrBP1b, PvrBP2a, PvrBP2b, PvrBP2c, PvrBP2p2 and Pfrh4 on plates, respectively. Graphs are a representative of two independent experiments. Source data are provided as a Source Data file.

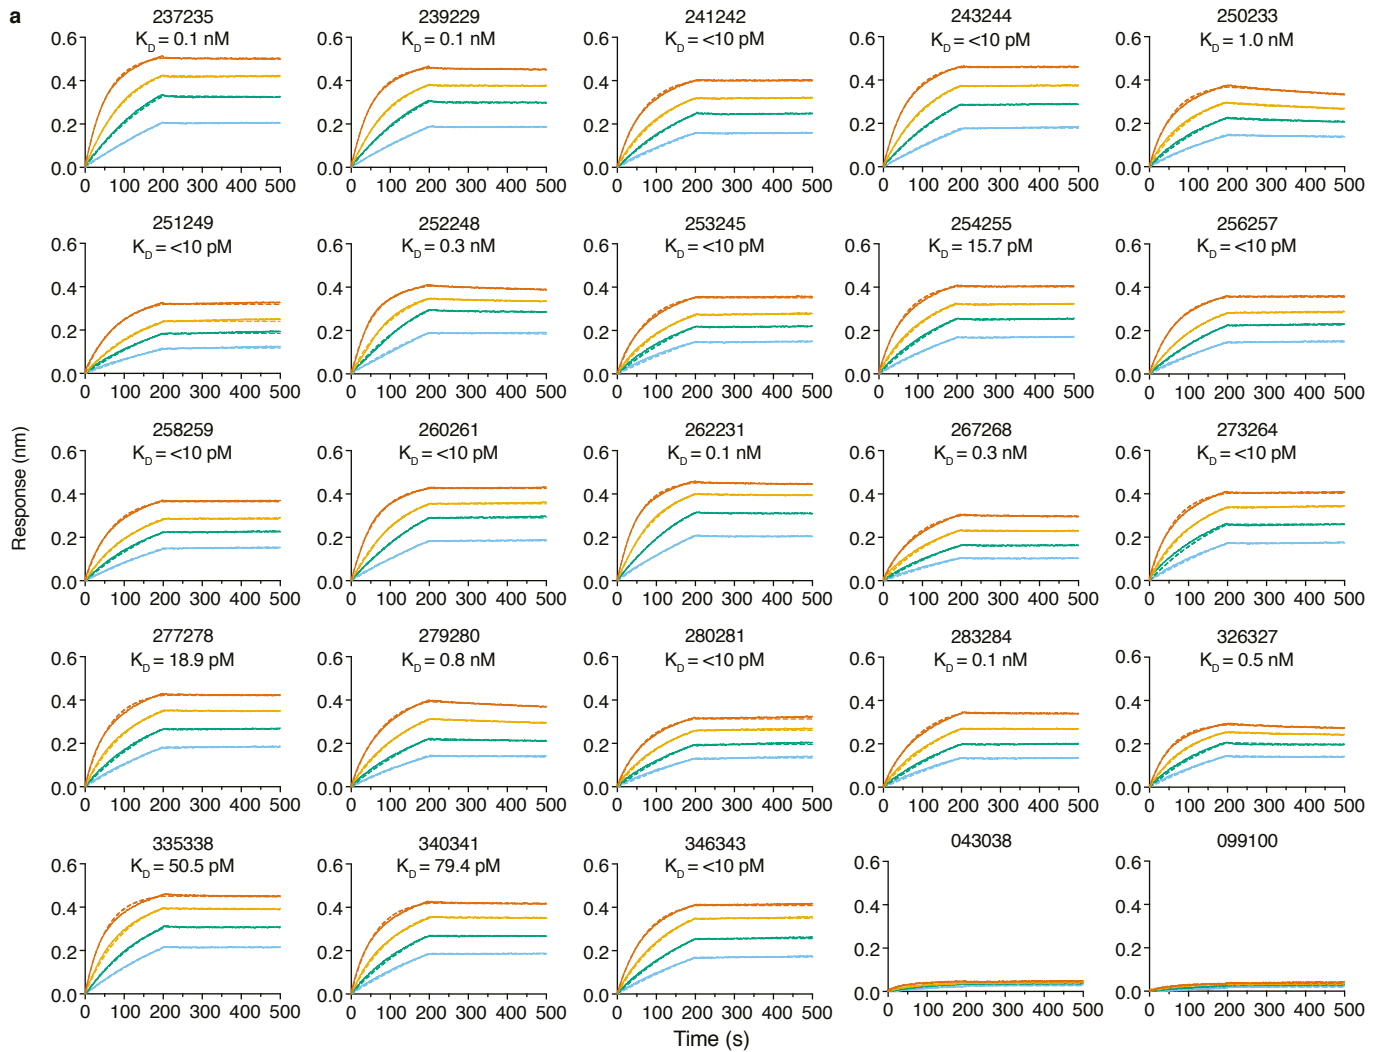

**b**

| mAb    | $k_a$ ( $M^{-1}s^{-1}$ ) | $k_d$ ( $s^{-1}$ ) | $K_D$ (M) |
|--------|--------------------------|--------------------|-----------|
| 237235 | 3.70E+05                 | 3.45E-05           | 8.83E-11  |
| 239229 | 3.87E+05                 | 4.60E-05           | 1.12E-10  |
| 241242 | 3.21E+05                 | 2.13E-05           | 6.10E-11  |
| 243244 | 3.37E+05                 | 1.15E-05           | 3.66E-11  |
| 250233 | 3.53E+05                 | 3.50E-04           | 9.88E-10  |
| 251249 | 2.71E+05                 | <1.00E-06          | <1.00E-11 |
| 252248 | 3.42E+05                 | 1.93E-04           | 5.86E-10  |
| 253245 | 2.73E+05                 | 8.17E-06           | 3.07E-11  |
| 254255 | 3.01E+05                 | 2.52E-05           | 7.42E-11  |
| 256257 | 2.84E+05                 | <1.00E-06          | <1.00E-11 |
| 258259 | 2.88E+05                 | 7.57E-06           | 2.69E-11  |
| 260261 | 3.29E+05                 | 6.23E-06           | 2.05E-11  |
| 262231 | 3.98E+05                 | 6.22E-05           | 1.40E-10  |
| 267268 | 2.40E+05                 | 5.71E-05           | 2.13E-10  |
| 273264 | 3.27E+05                 | 3.02E-05           | 8.30E-11  |
| 277278 | 3.76E+05                 | 3.08E-05           | 7.96E-11  |
| 279280 | 2.60E+05                 | 1.94E-04           | 7.27E-10  |
| 281282 | 2.63E+05                 | 6.03E-06           | 2.73E-11  |
| 283284 | 2.26E+05                 | 6.00E-05           | 2.46E-10  |
| 326327 | 3.78E+05                 | 2.46E-04           | 6.42E-10  |
| 335338 | 4.32E+05                 | 3.08E-05           | 7.82E-11  |
| 340341 | 3.37E+05                 | 3.85E-05           | 1.07E-10  |
| 346343 | 2.82E+05                 | <1.00E-06          | <1.00E-11 |

**Supplementary Figure S2. PvRBP2b human mAb binding kinetics by bio-layer interferometry.** (a) Representative sensorgrams (solid lines) and curve fitting analysis using a 1:1 model (dashed lines) for human mAbs binding to PvRBP2b<sub>161-1454</sub>. A two-fold concentration gradient of PvRBP2b<sub>161-1454</sub> from 6 - 50 nM is shown by the different colored lines (50 nM, red; 25 nM, orange; 12

nM, green; 6 nM, blue). The calculated  $K_D$  is shown for each sensorgram. 043038 and 099100 are isotype controls. (b) Table of association rate constants ( $k_a$ ), dissociation rate constants ( $k_d$ ) and equilibrium dissociation rate constants ( $K_D$ ) for PvRBP2b human mAbs. Table values are the mean of four independent experiments. Source data are provided as a Source Data file.

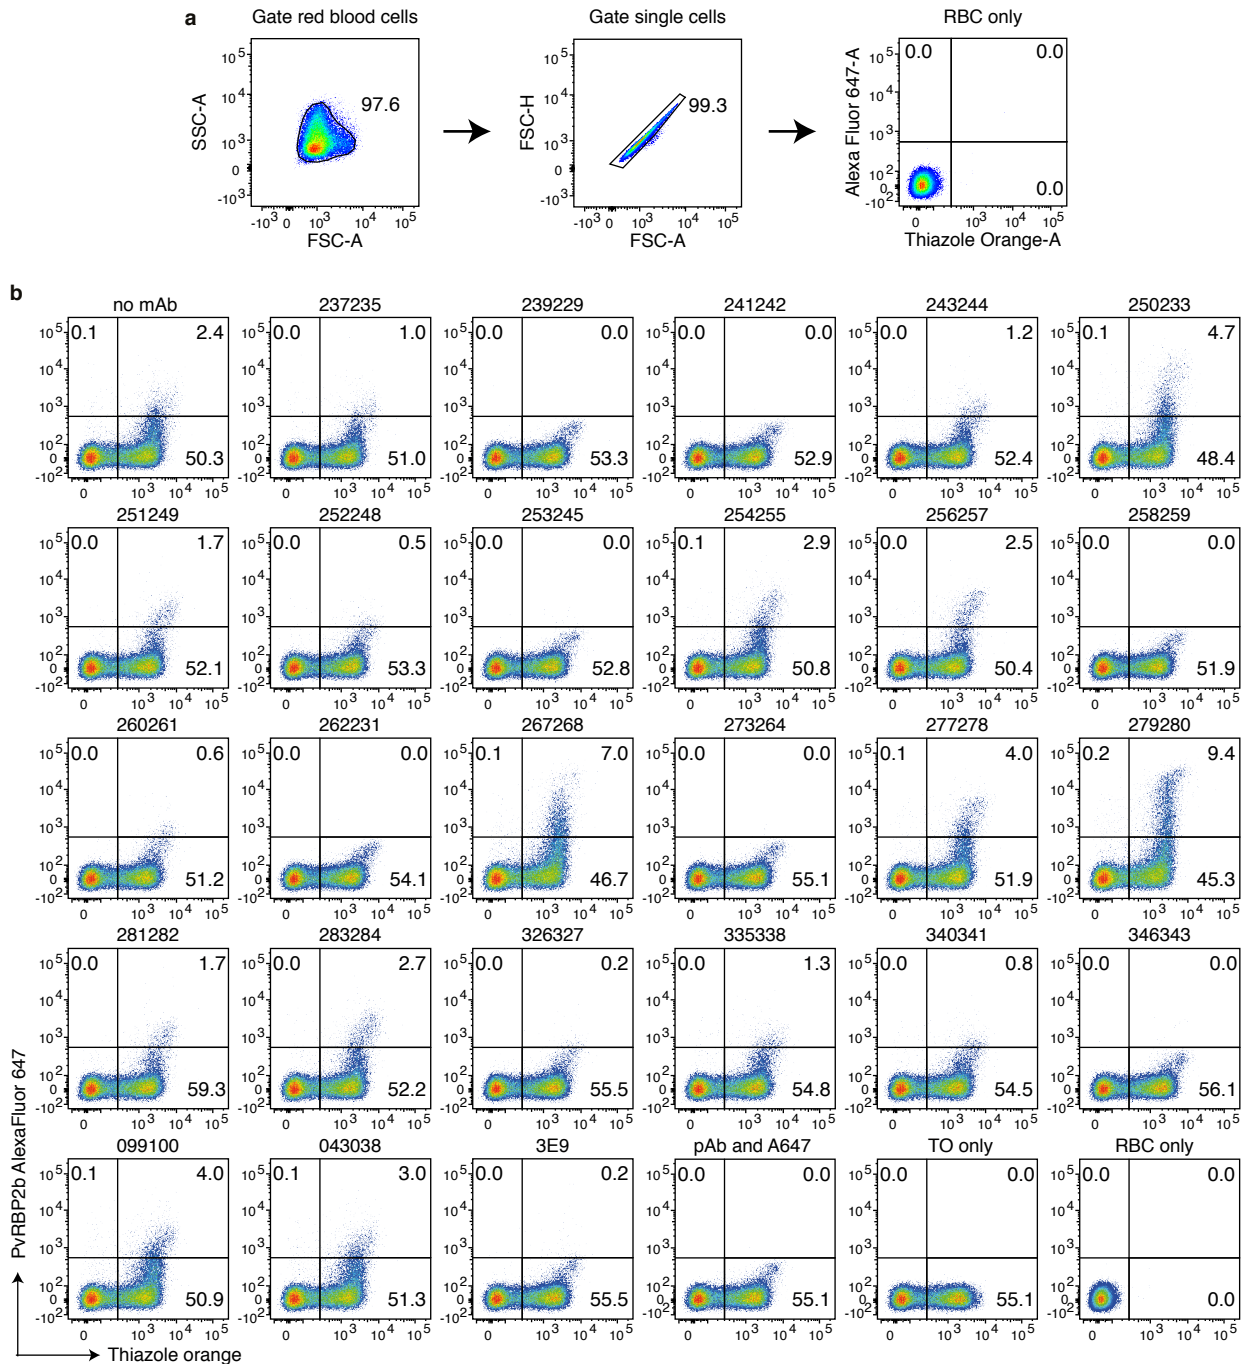

**Supplementary Figure S3. PvRBP2b human mAbs block PvRBP2b binding to reticulocytes.** (a) Gating strategy for red blood cells. Red blood cells were gated using forward (FSC-A) and side scatter (SSC-A). Single cells were gated using forward scatter area (A) and height (H). Thiazole orange nucleic acid dye (TO) was used to stain the reticulocyte population on the x-axis. PvRBP2b<sub>161-1454</sub> binding was detected with PvRBP2b polyclonal antibodies (pAb) and Alexa 647 secondary antibody on the y-axis. (b) Representative dot

plots showing the binding of PvRBP2b<sub>161-1454</sub> to reticulocytes in the presence of PvRBP2b human mAbs. 099100 and 043038 were isotype controls and 3E9 was an inhibitory mouse mAb control. The reticulocyte population was gated on the red blood cell (RBC) population and the PvRBP2b<sub>161-1454</sub> positive population was gated on the detecting antibodies (pAb and A647) control that showed a background signal.

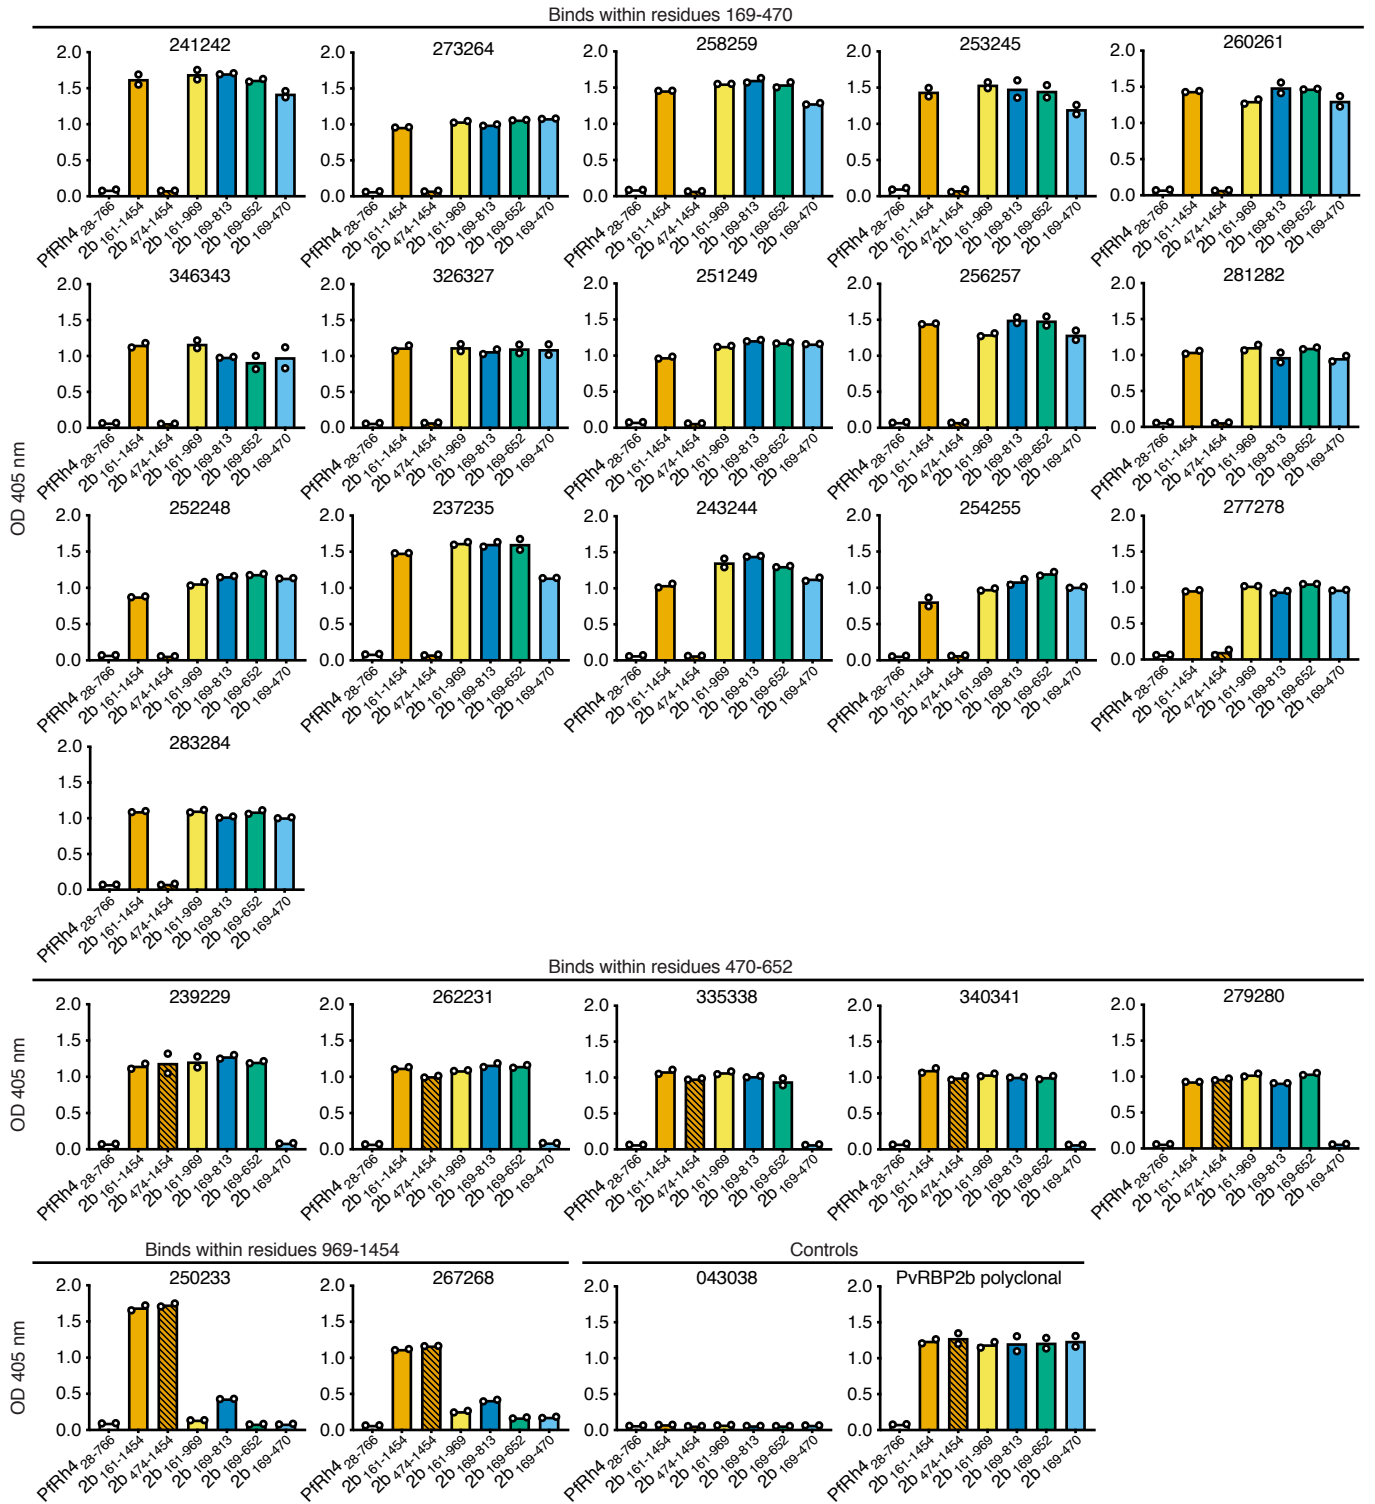

**Supplementary Figure S4. Domain mapping of PvrBP2b human mAb epitopes.** Binding of PvrBP2b human mAbs to PvrBP2b recombinant fragments and PFrh4<sub>28-766</sub> was detected by ELISA. PFrh4<sub>28-766</sub> was used as a control for non-specific binding of PvrBP2b human mAbs. PvrBP2b polyclonal antibody was used to detect

coating of PvrBP2b fragments and 043038 was used as a negative control. Bar graphs represent the mean of duplicate measures represented as circles. Graphs are a representative of two independent experiments. Source data are provided as a Source Data file.



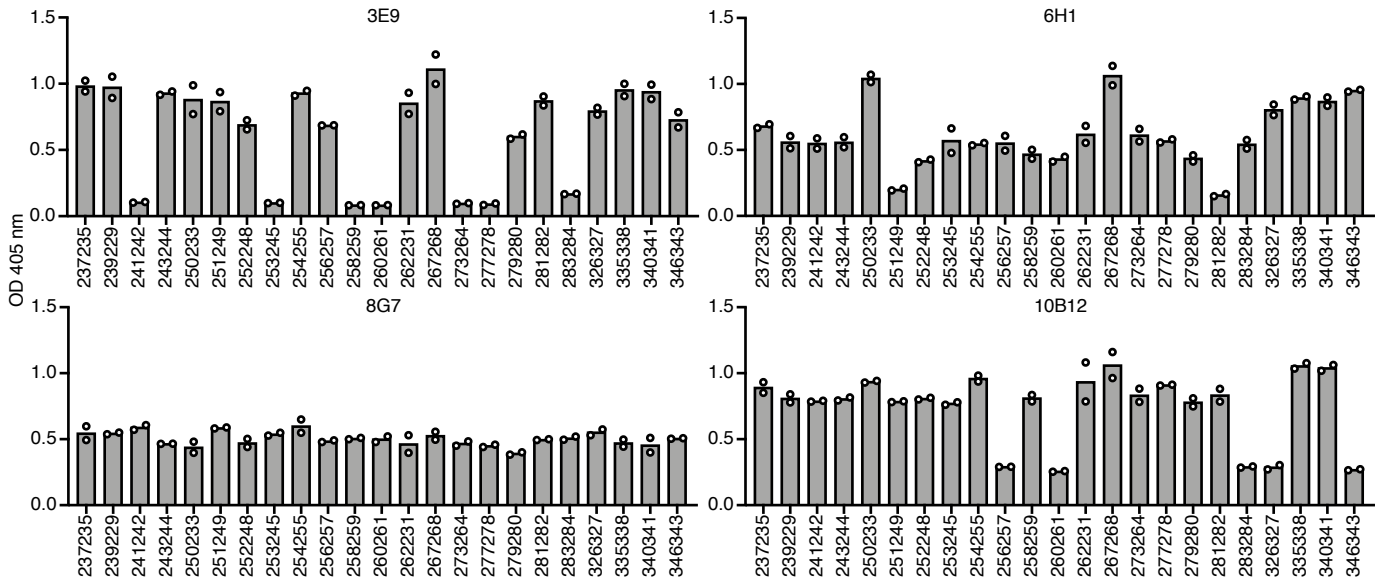

**Supplementary Figure S5. Competition between PvRBP2b human mAbs with PvRBP2b mouse mAbs.** Competition ELISA using immobilized PvRBP2b mouse mAbs incubated with a mixture of PvRBP2b human mAbs with PvRBP2b<sub>161-1454</sub> at a 20:1 molar ratio.

Bar graphs represent the mean of duplicate measures represented as circles. Graphs are a representative of two independent experiments. Source data are provided as a Source Data file.

## RBP2b peptide map

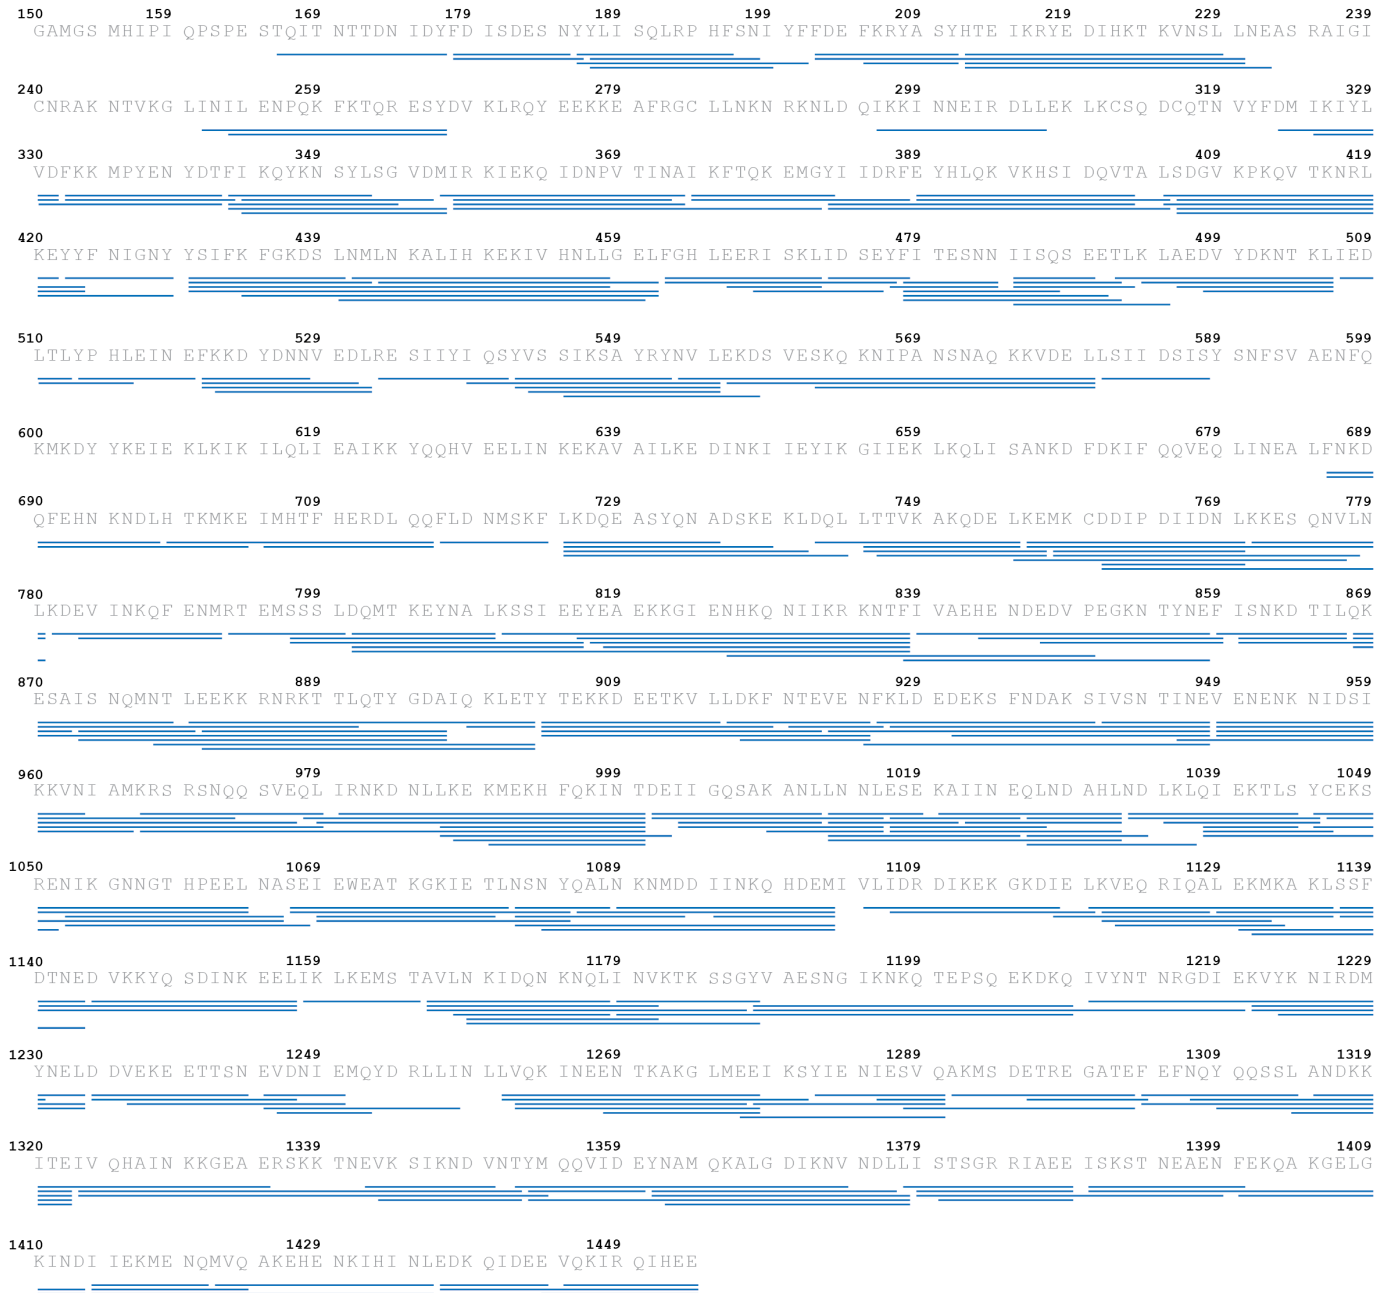

**Supplementary Figure S6. HDX peptide map for PvRBP2b<sub>161-1454</sub>.** PvRBP2b<sub>161-1454</sub> peptide map showing the peptides used for HDX-MS analysis.

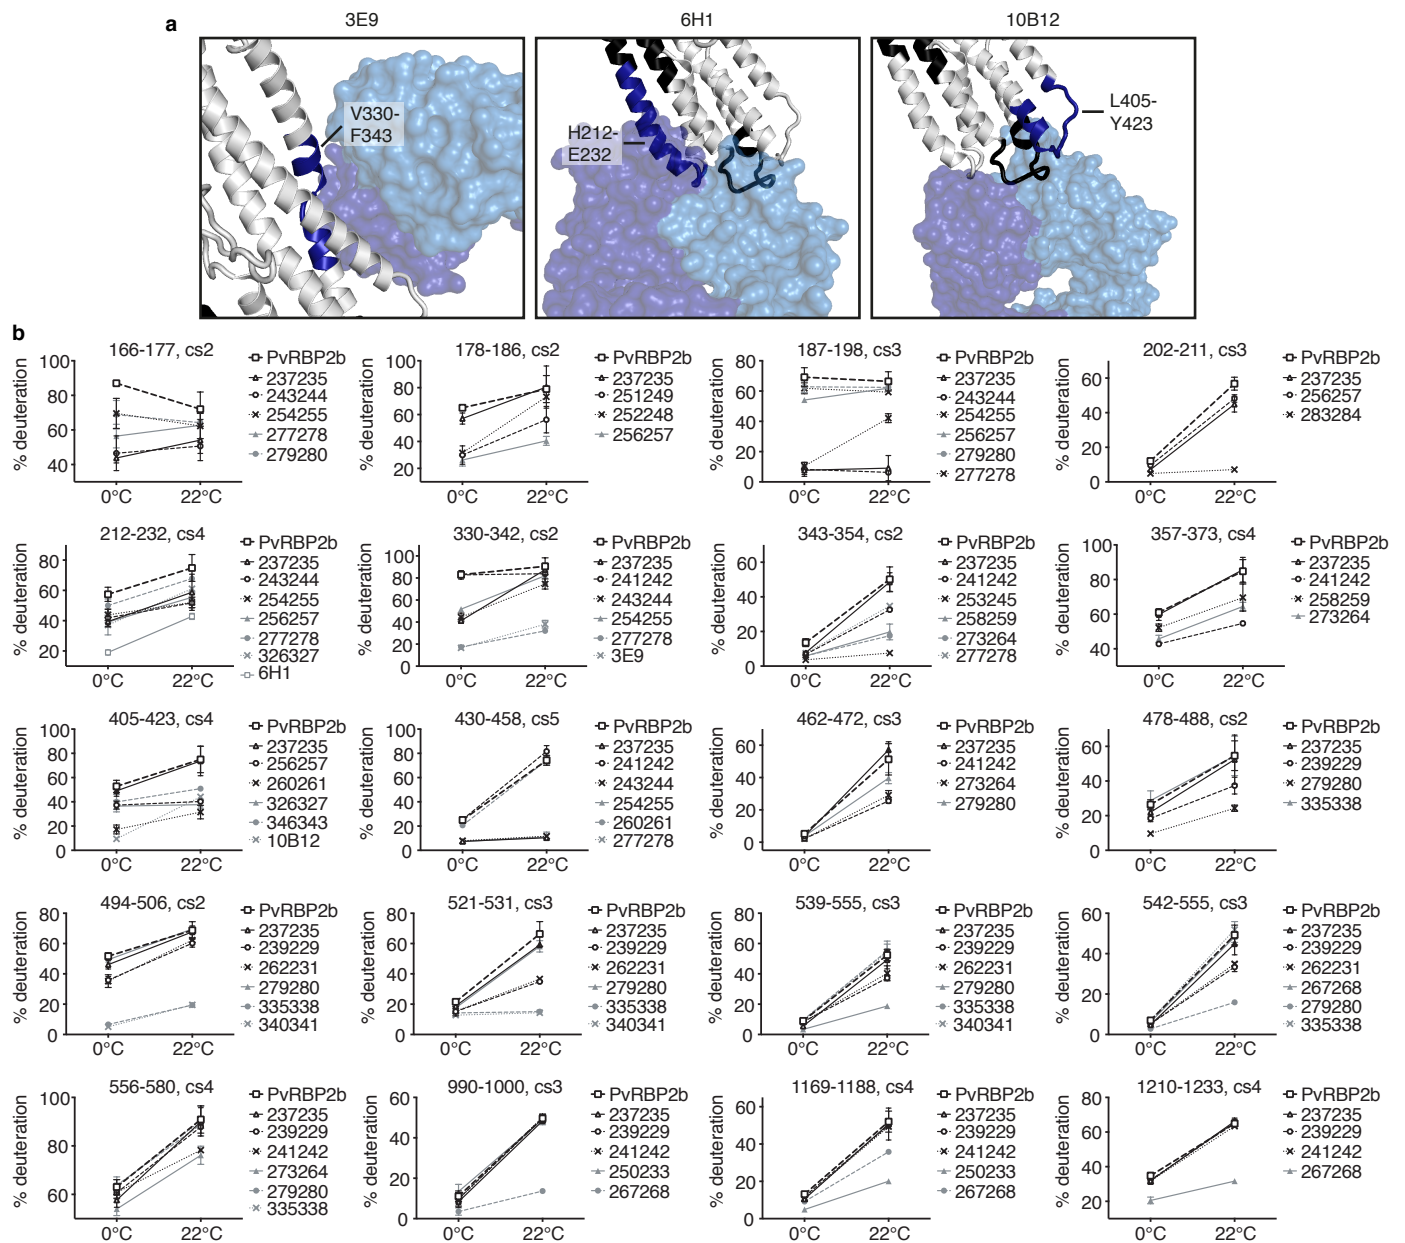

**Supplementary Figure S7. Comparison between PvRBP2b epitopes identified by HDX-MS and X-ray crystallography for mouse mAbs and HDX-MS uptake plots for a selection of PvRBP2b peptides. (a)** Combination of HDX-MS data with crystal structures of PvRBP2b mouse Fab fragments bound to PvRBP2b. Fabs shown in transparent surface representation. Regions that show protection by HDX-MS for each mAb are colored in blue and the residue range is labelled. Black indicates the regions where no peptides were detected by mass spectrometry. **(b)** Uptake plots showing deuterium incorporation levels for a selection of PvRBP2b peptides. For each peptide, the level of deuteration, expressed as

percentage compared to a highly deuterated sample, is shown for samples incubated 5 min in deuterated buffer at 0°C and 22°C. One peptide representative of each of the PvRBP2b region showing protection in Fig. 4A is shown. Deuteration level of PvRBP2b alone is shown for every peptide. A selection of mAb showing either no change or a significant difference in deuteration level compared to PvRBP2b alone is shown for every peptide. n=3 independent experiments. Data are presented as mean  $\pm$  SD. Abbreviation: cs: charge state of the analyzed peptide. Source data are provided as a Source Data file.

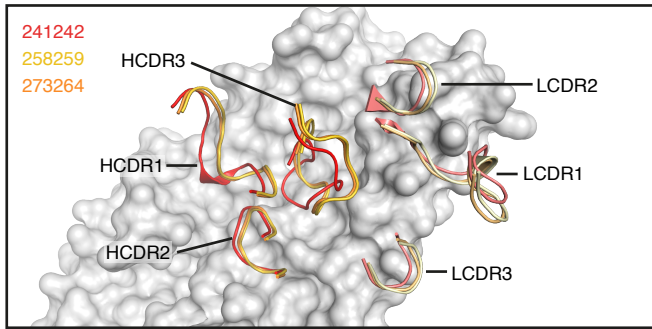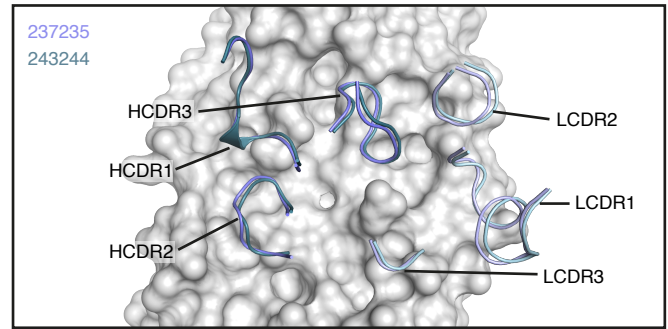

**Supplementary Figure S8. Superimposed CDR loops of antibodies with overlapping binding sites.** (Left panel) Superimposed CDR loop structures (HCDR; heavy chain CDR loops, LCDR; light chain CDR loops) of 241242 (HCDR: red, LCDR: pink), 258259 (HCDR: yellow, LCDR: light yellow) and 273264 (HCDR:

orange, LCDR: light orange) (same clonal group as 258259) binding to PvRBP2b. (Right panel) Superimposed CDR loops of 237235 (HCDR: lavender blue, LCDR: light lavender blue) and 243244 (HCDR: slate, LCDR: light blue) (both from the same clonal group) binding to PvRBP2b.

**a**

```

150          200          250
GAMGSMHIQIPSPSTQITNTTNDIDYFDISDESNYLLISQLRPHFSNIYFFDEFKRYASYHTEIKRR217YEDIHKTR242KNVSNLLNEASRAIGICNR242AKNTVKGLINILENPQKF
          K288          K309          K363 D366
KTQRESYDVKLRQYEEKKEAFRGCLLNK288NRKNLDQIKKINNEIRDLLK309KLKCSQDCQTNVYFDMIKIYLVDFKMPYENYDTFIKQYKNSYLSGVDMIRKIEK363KQIDNP
          G382          400          450
VTINAIKFTQKEMGYIIDRFYHLQKVKHSIDQVTALSDGVKPKQVTKNRLKEYYFNIGNYYSIFKFGKDSLNLNG382KALIHKEKIVHNLGELFGHLEERISKD366LIDSEYFI
          E497 500          550          Q564
TESNNISQSEETLKLAEE497DVYDKNTKLIEDLTLYPHLEINEFKDYDNNVEDLRESIIYQSYVSSIKSAYRYNVLEKD558SVESKQ564QKNIPANSNAQKKVDELLSID366SISYS
N591          600
NFSVAENFQMKMDYYKEIEKLKIKILQLIEAIKKYQQHVEELI

```

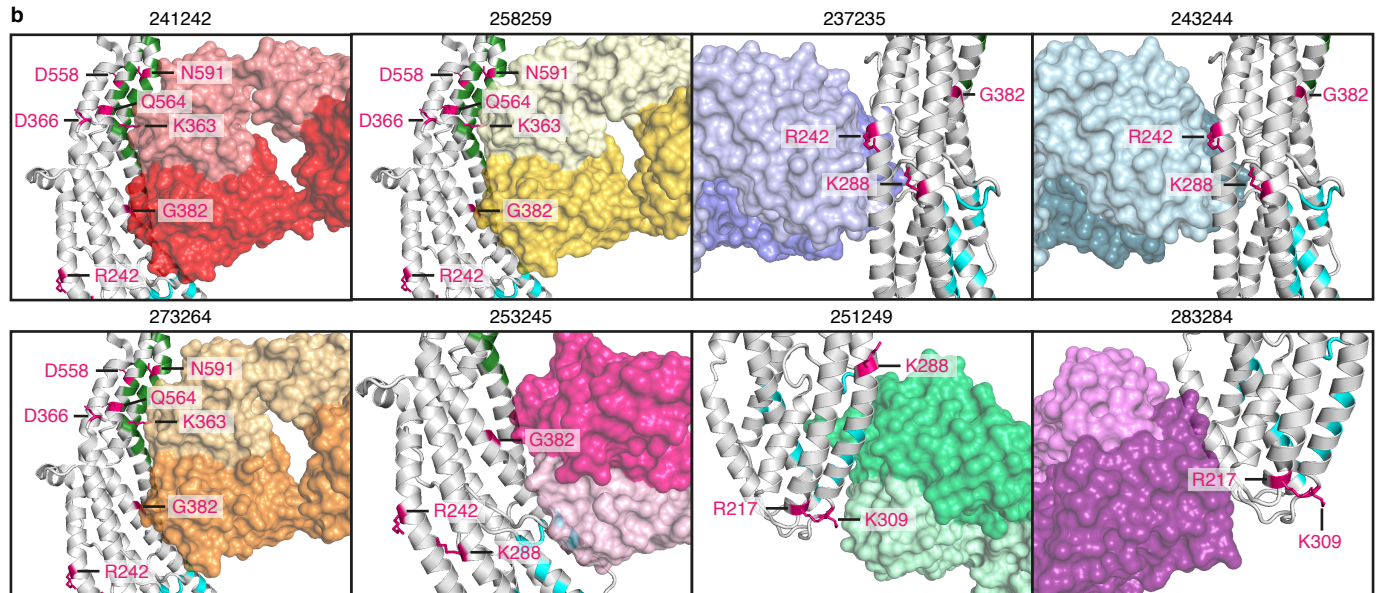

**Supplementary Figure S9. PvRBP2b polymorphisms.** (a) Sequence of the receptor binding region of PvRBP2b. Polymorphic residues are colored in pink and labelled. Regions that interact with TfR1 and Tf are highlighted in green and cyan, respectively. (b) Mapping of PvRBP2b polymorphisms on X-ray crystal structures. Polymorphisms are colored in pink and labelled. Regions that interact with TfR1 and Tf are highlighted in green and cyan, respectively.

Supplementary Table S1. Primer Table

|    | Clones | Heavy Gene Forward Primer | Sequence                                 | Heavy Gene Reverse Primer | Sequence                           |
|----|--------|---------------------------|------------------------------------------|---------------------------|------------------------------------|
| 1  | 237235 | 5' Agel VH3 33            | CTGCAACCGGTGTACATTCTCAGGTGCAGCTGGTGGAG   | 3' Sall JH 3              | TGCGAAGTCGACGCTGAAGAGACGGTGACCATTG |
| 2  | 239229 | 5' Agel VH 1/5            | CTGCAACCGGTGTACATTCCGAGGTGCAGCTGGTGCAG   | 3' Sall JH 1/2/4/5        | TGCGAAGTCGACGCTGAGGAGACGGTGACCAG   |
| 3  | 241242 | 5' Agel VH3 23            | CTGCAACCGGTGTACATTCTGAGGTGCAGCTGTTGGAG   | 3' Sall JH 1/2/4/5        | TGCGAAGTCGACGCTGAGGAGACGGTGACCAG   |
| 4  | 243244 | 5' Agel VH3 33            | CTGCAACCGGTGTACATTCTCAGGTGCAGCTGGTGGAG   | 3' Sall JH 3              | TGCGAAGTCGACGCTGAAGAGACGGTGACCATTG |
| 5  | 250233 | 5' Agel VH3               | CTGCAACCGGTGTACATTCTGAGGTGCAGCTGGTGGAG   | 3' Sall JH 3              | TGCGAAGTCGACGCTGAAGAGACGGTGACCATTG |
| 6  | 251249 | 5' Agel VH 3 9            | CTGCAACCGGTGTACATTCTGAAAGTGCAGCTGGTGGAG  | 3' Sall JH 1/2/4/5        | TGCGAAGTCGACGCTGAGGAGACGGTGACCAG   |
| 7  | 252248 | 5' Agel VH 3 9            | CTGCAACCGGTGTACATTCTGAAAGTGCAGCTGGTGGAG  | 3' Sall JH 3              | TGCGAAGTCGACGCTGAAGAGACGGTGACCATTG |
| 8  | 253245 | 5' Agel VH 1/5            | CTGCAACCGGTGTACATTCCGAGGTGCAGCTGGTGCAG   | 3' Sall JH 1/2/4/5        | TGCGAAGTCGACGCTGAGGAGACGGTGACCAG   |
| 9  | 254255 | 5' Agel VH3 30            | CTGCAACCGGTGTACATTCTCAGGTGCAGCTGGTGGAG   | 3' Sall JH 1/2/4/5        | TGCGAAGTCGACGCTGAGGAGACGGTGACCAG   |
| 10 | 256257 | 5' Agel VH4 34            | CTGCAACCGGTGTACATTCCCAGGTGCAGCTACAGCAGTG | 3' Sall JH 1/2/4/5        | TGCGAAGTCGACGCTGAGGAGACGGTGACCAG   |
| 11 | 258259 | 5' Agel VH3 23            | CTGCAACCGGTGTACATTCTGAGGTGCAGCTGTTGGAG   | 3' Sall JH 3              | TGCGAAGTCGACGCTGAAGAGACGGTGACCATTG |
| 12 | 260261 | 5' Agel VH3               | CTGCAACCGGTGTACATTCTGAGGTGCAGCTGGTGGAG   | 3' Sall JH 1/2/4/5        | TGCGAAGTCGACGCTGAGGAGACGGTGACCAG   |
| 13 | 262231 | 5' Agel VH 1/5            | CTGCAACCGGTGTACATTCCGAGGTGCAGCTGGTGCAG   | 3' Sall JH 1/2/4/5        | TGCGAAGTCGACGCTGAGGAGACGGTGACCAG   |
| 14 | 267268 | 5' Agel VH 3 9            | CTGCAACCGGTGTACATTCTGAAAGTGCAGCTGGTGGAG  | 3' Sall JH 1/2/4/5        | TGCGAAGTCGACGCTGAGGAGACGGTGACCAG   |
| 15 | 273264 | 5' Agel VH3 23            | CTGCAACCGGTGTACATTCTGAGGTGCAGCTGTTGGAG   | 3' Sall JH 3              | TGCGAAGTCGACGCTGAAGAGACGGTGACCATTG |
| 16 | 277278 | 5' Agel VH3-53            | CTGCAACCGGTGTACATTCCCAGGTGCAGCTGGTGCAG   | 3' Sall JH 3              | TGCGAAGTCGACGCTGAAGAGACGGTGACCATTG |
| 17 | 279280 | 5' Agel VH4 34            | CTGCAACCGGTGTACATTCCCAGGTGCAGCTACAGCAGTG | 3' Sall JH 1/2/4/5        | TGCGAAGTCGACGCTGAGGAGACGGTGACCAG   |
| 18 | 281282 | 5' Agel VH 3 9            | CTGCAACCGGTGTACATTCTGAAAGTGCAGCTGGTGGAG  | 3' Sall JH 3              | TGCGAAGTCGACGCTGAAGAGACGGTGACCATTG |
| 19 | 283284 | 5' Agel VH4 34            | CTGCAACCGGTGTACATTCCCAGGTGCAGCTACAGCAGTG | 3' Sall JH 1/2/4/5        | TGCGAAGTCGACGCTGAGGAGACGGTGACCAG   |
| 20 | 326327 | 5' Agel VH4 34            | CTGCAACCGGTGTACATTCCCAGGTGCAGCTACAGCAGTG | 3' Sall JH 1/2/4/5        | TGCGAAGTCGACGCTGAGGAGACGGTGACCAG   |
| 21 | 335338 | 5' Agel VH4-59            | CTGCAACCGGTGTACATTCTGAGGTGCAGCTGGTGGAG   | 3' Sall JH 6              | TGCGAAGTCGACGCTGAGGAGACGGTGACCAGTG |
| 22 | 340341 | 5' Agel VH4-59            | CTGCAACCGGTGTACATTCTGAGGTGCAGCTGGTGGAG   | 3' Sall JH 6              | TGCGAAGTCGACGCTGAGGAGACGGTGACCAGTG |
| 23 | 346343 | 5' Agel VH4-59            | CTGCAACCGGTGTACATTCTGAGGTGCAGCTGGTGGAG   | 3' Sall JH 1/2/4/5        | TGCGAAGTCGACGCTGAGGAGACGGTGACCAG   |

|    | Clones | Light Gene Forward Primer | Sequence                                        | Light Gene Reverse Primer | Sequence                        |
|----|--------|---------------------------|-------------------------------------------------|---------------------------|---------------------------------|
| 1  | 237235 | 5' Agel V lambda 2        | CTGCTACCGGTTCTGGGCCAGTCTGCCCTGACTCAG            | 3' XhoI C lambda          | CTCCTCACTCGAGGGYGGGAACAGAGTG    |
| 2  | 239229 | 5' Agel Vk 3 11           | TTGTGCTGCAACCGGTGTACATTGAGAAATTTGTGTTGACACAGTC  | 3' BsiWI Jk 2             | GCCACCGTACGTTTGGATCTCCAGCTTGGTC |
| 3  | 241242 | 5' Agel V lambda 3        | CTGCTACCGGTTCTGTGACCTCCTATGAGCTGACWCAG          | 3' XhoI C lambda          | CTCCTCACTCGAGGGYGGGAACAGAGTG    |
| 4  | 243244 | 5' Agel V lambda 2        | CTGCTACCGGTTCTGGGCCAGTCTGCCCTGACTCAG            | 3' XhoI C lambda          | CTCCTCACTCGAGGGYGGGAACAGAGTG    |
| 5  | 250233 | 5' Agel Vk 3 11           | TTGTGCTGCAACCGGTGTACATTGAGAAATTTGTGTTGACACAGTC  | 3' BsiWI Jk 1/4           | GCCACCGTACGTTTGGATYTCACCTTGGTC  |
| 6  | 251249 | 5' Agel Vk 3 11           | TTGTGCTGCAACCGGTGTACATTGAGAAATTTGTGTTGACACAGTC  | 3' BsiWI Jk 1/4           | GCCACCGTACGTTTGGATYTCACCTTGGTC  |
| 7  | 252248 | 5' Agel Vk 4 1            | CTGCAACCGGTGTACATTCCGACATCGTGATGACCCAGTC        | 3' BsiWI Jk 1/4           | GCCACCGTACGTTTGGATYTCACCTTGGTC  |
| 8  | 253245 | 5' Agel V lambda 2        | CTGCTACCGGTTCTGGGCCAGTCTGCCCTGACTCAG            | 3' XhoI C lambda          | CTCCTCACTCGAGGGYGGGAACAGAGTG    |
| 9  | 254255 | 5' Agel Vk 3 15           | CTGCAACCGGTGTACATTGAGAAATAGTGATGACGCAGTC        | 3' BsiWI Jk 3             | GCCACCGTACGTTTGGATATCCACTTGGTC  |
| 10 | 256257 | 5' Agel V lambda 3        | CTGCTACCGGTTCTGTGACCTCCTATGAGCTGACWCAG          | 3' XhoI C lambda          | CTCCTCACTCGAGGGYGGGAACAGAGTG    |
| 11 | 258259 | 5' Agel V lambda 3        | CTGCTACCGGTTCTGTGACCTCCTATGAGCTGACWCAG          | 3' XhoI C lambda          | CTCCTCACTCGAGGGYGGGAACAGAGTG    |
| 12 | 260261 | 5' Agel V lambda 3        | CTGCTACCGGTTCTGTGACCTCCTATGAGCTGACWCAG          | 3' XhoI C lambda          | CTCCTCACTCGAGGGYGGGAACAGAGTG    |
| 13 | 262231 | 5' Agel Vk 3 11           | TTGTGCTGCAACCGGTGTACATTGAGAAATTTGTGTTGACACAGTC  | 3' BsiWI Jk 2             | GCCACCGTACGTTTGGATCTCCAGCTTGGTC |
| 14 | 267268 | 5' Agel Vk 1 5            | CTGCAACCGGTGTACATTCTGACATCCAGATGACCCAGTC        | 3' BsiWI Jk 2             | GCCACCGTACGTTTGGATCTCCAGCTTGGTC |
| 15 | 273264 | 5' Agel V lambda 3        | CTGCTACCGGTTCTGTGACCTCCTATGAGCTGACWCAG          | 3' XhoI C lambda          | CTCCTCACTCGAGGGYGGGAACAGAGTG    |
| 16 | 277278 | 5' Agel V lambda 3        | CTGCTACCGGTTCTGTGACCTCCTATGAGCTGACWCAG          | 3' XhoI C lambda          | CTCCTCACTCGAGGGYGGGAACAGAGTG    |
| 17 | 279280 | 5' Agel V lambda 1        | CTGCTACCGGTTCTGGGCCAGTCTGTGCTGACKCAG            | 3' XhoI C lambda          | CTCCTCACTCGAGGGYGGGAACAGAGTG    |
| 18 | 281282 | 5' Agel Vk 1 5            | CTGCAACCGGTGTACATTCTGACATCCAGATGACCCAGTC        | 3' BsiWI Jk 1/4           | GCCACCGTACGTTTGGATYTCACCTTGGTC  |
| 19 | 283284 | 5' Agel Vk 1 5            | CTGCAACCGGTGTACATTCTGACATCCAGATGACCCAGTC        | 3' BsiWI Jk 1/4           | GCCACCGTACGTTTGGATYTCACCTTGGTC  |
| 20 | 326327 | 5' Agel Vk 1 5            | CTGCAACCGGTGTACATTCTGACATCCAGATGACCCAGTC        | 3' BsiWI Jk 3             | GCCACCGTACGTTTGGATATCCACTTGGTC  |
| 21 | 335338 | 5' Agel Vk 3 20           | TTGTGCTGCAACCGGTGTACATTGAGAAATTTGTGTTGACGCAGTCT | 3' BsiWI Jk 1/4           | GCCACCGTACGTTTGGATYTCACCTTGGTC  |
| 22 | 340341 | 5' Agel Vk 3 20           | TTGTGCTGCAACCGGTGTACATTGAGAAATTTGTGTTGACGCAGTCT | 3' BsiWI Jk 1/4           | GCCACCGTACGTTTGGATYTCACCTTGGTC  |
| 23 | 346343 | 5' Agel Vk 3 15           | CTGCAACCGGTGTACATTGAGAAATAGTGATGACGCAGTC        | 3' BsiWI Jk 1/4           | GCCACCGTACGTTTGGATYTCACCTTGGTC  |



**Supplementary Table S2 | Data collection and refinement statistics for PvRBP2b complexes with PvRBP2b human Fab fragments.**

|                                                         | PvRBP2b-<br>237235<br>(PDB 6WM9) | PvRBP2b-<br>241242<br>(PDB 6WN1) | PvRBP2b-<br>243244<br>(PDB 6WNO) | PvRBP2b-<br>251249<br>(PDB 6WOZ) | PvRBP2b-<br>253245<br>(PDB 6WTY) |
|---------------------------------------------------------|----------------------------------|----------------------------------|----------------------------------|----------------------------------|----------------------------------|
| <b>Data collection<sup>a</sup></b>                      |                                  |                                  |                                  |                                  |                                  |
| Space group                                             | P 1                              | C 1 2 1                          | P 1                              | P 1 2 <sub>1</sub> 1             | P 1 2 <sub>1</sub> 1             |
| Cell dimensions                                         |                                  |                                  |                                  |                                  |                                  |
| <i>a</i> , <i>b</i> , <i>c</i> (Å)                      | 61.90, 86.78,<br>90.77           | 360.70, 43.70,<br>115.33         | 61.01, 84.44,<br>90.91           | 99.57, 163.55,<br>121.76         | 70.56, 78.19,<br>312.08          |
| $\alpha$ , $\beta$ , $\gamma$ (°)                       | 91.62, 109.98,<br>99.88          | 90.00, 101.69,<br>90.00          | 90.73, 110.12,<br>103.10         | 90.00, 99.19,<br>90.00           | 90.00, 94.16,<br>90.00           |
| Resolution (Å)                                          | 43.67-2.45<br>(2.51-2.45)        | 43.72-3.15<br>(3.23-3.15)        | 43.00-3.35<br>(3.44-3.35)        | 49.14-2.90<br>(3.07-2.90)        | 48.70-3.48<br>(3.69-3.48)        |
| <i>R</i> <sub>meas</sub>                                | 17.9 (73.6)                      | 17.0 (121.5)                     | 21.6 (98.8)                      | 19.5 (148.4)                     | 85.7 (317.9) <sup>b</sup>        |
| <i>I</i> / $\sigma$ ( <i>I</i> )                        | 7.4 (1.8)                        | 8.9 (1.3)                        | 6.9 (1.6)                        | 9.8 (1.3)                        | 2.5 (0.5)                        |
| <i>CC</i> <sub>1/2</sub> (%)                            | 98.8 (72.4)                      | 99.4 (57.2)                      | 98.9 (68.5)                      | 99.7 (65.3)                      | 85.0 (13.1)                      |
| Completeness (%)                                        | 97.4 (96.6)                      | 99.6 (99.9)                      | 97.7 (97.4)                      | 99.4 (96.6)                      | 98.7 (93.1)                      |
| Redundancy                                              | 3.3 (3.4)                        | 3.8 (3.8)                        | 3.5 (3.5)                        | 7.1 (6.7)                        | 5.4 (5.1)                        |
| Wilson <i>B</i> (Å <sup>2</sup> )                       | 55.2                             | 64.5                             | 68.2                             | 61.0                             | 60.6                             |
| <b>Refinement</b>                                       |                                  |                                  |                                  |                                  |                                  |
| No. reflections                                         | 62,347                           | 31,277                           | 23,187                           | 84,919                           | 43,318                           |
| <i>R</i> <sub>work</sub> / <i>R</i> <sub>free</sub> (%) | 22.3 / 27.9                      | 25.1 / 28.3                      | 24.5 / 28.4                      | 21.1 / 25.8                      | 26.2/30.1                        |
| No. atoms                                               |                                  |                                  |                                  |                                  |                                  |
| Protein                                                 | 11,251                           | 8,910                            | 10,596                           | 22,580                           | 19,922                           |
| Water                                                   | 559                              | -                                | -                                | -                                | -                                |
| <i>B</i> factors                                        |                                  |                                  |                                  |                                  |                                  |
| Protein                                                 | 33.6                             | 76.5                             | 75.0                             | 61.8                             | 74.7                             |
| Water                                                   | 32.0                             | -                                | -                                | -                                | -                                |
| R.m.s. deviations                                       |                                  |                                  |                                  |                                  |                                  |
| Bond lengths (Å)                                        | 0.002                            | 0.002                            | 0.002                            | 0.002                            | 0.001                            |
| Bond angles (°)                                         | 0.489                            | 0.441                            | 0.456                            | 0.482                            | 0.413                            |
| Validation                                              |                                  |                                  |                                  |                                  |                                  |
| MolProbity score                                        | 1.36                             | 1.58                             | 1.65                             | 1.45                             | 1.51                             |
| Clashscore                                              | 4.88                             | 5.84                             | 7.40                             | 4.19                             | 3.60                             |
| Poor rotamers (%)                                       | -                                | -                                | -                                | -                                | -                                |
| Ramachandran plot                                       |                                  |                                  |                                  |                                  |                                  |
| Favored (%)                                             | 97.5                             | 96.2                             | 96.4                             | 96.3                             | 94.8                             |
| Allowed (%)                                             | 2.6                              | 3.8                              | 3.7                              | 3.7                              | 5.2                              |
| Disallowed (%)                                          | -                                | -                                | -                                | -                                | -                                |

Supplementary Table S2 | continued

|                                                         | PvRBP2b-<br>258259<br>(PDB 6WTV) | PvRBP2b-<br>273264<br>(PDB 6WTU) | PvRBP2b-<br>283284<br>(PDB 6WQO)               |
|---------------------------------------------------------|----------------------------------|----------------------------------|------------------------------------------------|
| <b>Data collection</b>                                  |                                  |                                  |                                                |
| Space group                                             | P 1                              | P 1                              | P 2 <sub>1</sub> 2 <sub>1</sub> 2 <sub>1</sub> |
| Cell dimensions                                         |                                  |                                  |                                                |
| <i>a</i> , <i>b</i> , <i>c</i> (Å)                      | 93.80, 98.65,<br>103.09          | 93.99, 99.51,<br>103.49          | 88.25, 126.18,<br>149.63                       |
| $\alpha$ , $\beta$ , $\gamma$ (°)                       | 114.15, 105.00,<br>89.69         | 114.72, 104.98,<br>89.81         | 90.00, 90.00,<br>90.00                         |
| Resolution (Å)                                          | 45.01-3.05<br>(3.23-3.05)        | 49.03-2.55<br>(2.62-2.55)        | 42.32-3.15<br>(3.23-3.15)                      |
| <i>R</i> <sub>meas</sub>                                | 22.6 (65.5)                      | 10.7 (94.3)                      | 27.8 (129.7)                                   |
| <i>I</i> / $\sigma$ ( <i>I</i> )                        | 5.2 (2.0)                        | 10.0 (1.5)                       | 6.3 (1.4)                                      |
| <i>CC</i> <sub>1/2</sub> (%)                            | 97.1 (65.5)                      | 99.7 (64.5)                      | 98.2 (47.4)                                    |
| Completeness (%)                                        | 97.4 (94.9)                      | 98.2 (97.9)                      | 99.3 (97.7)                                    |
| Redundancy                                              | 2.5 (2.5)                        | 3.6 (3.6)                        | 5.5 (5.7)                                      |
| Wilson <i>B</i> (Å <sup>2</sup> )                       | 37.8                             | 54.6                             | 52.2                                           |
| <b>Refinement</b>                                       |                                  |                                  |                                                |
| No. reflections                                         | 60,481                           | 104,773                          | 29,354                                         |
| <i>R</i> <sub>work</sub> / <i>R</i> <sub>free</sub> (%) | 23.5 / 27.7                      | 20.8 / 25.5                      | 25.4 / 30.5                                    |
| No. atoms                                               |                                  |                                  |                                                |
| Protein                                                 | 20,978                           | 22,128                           | 10,482                                         |
| Water                                                   | -                                | 392                              | -                                              |
| <i>B</i> factors                                        |                                  |                                  |                                                |
| Protein                                                 | 40.5                             | 55.7                             | 62.3                                           |
| Water                                                   | -                                | 46.7                             | -                                              |
| R.m.s. deviations                                       |                                  |                                  |                                                |
| Bond lengths (Å)                                        | 0.002                            | 0.002                            | 0.002                                          |
| Bond angles (°)                                         | 0.436                            | 0.497                            | 0.467                                          |
| Validation                                              |                                  |                                  |                                                |
| MolProbity score                                        | 1.65                             | 1.44                             | 1.68                                           |
| Clashscore                                              | 6.34                             | 4.33                             | 6.62                                           |
| Poor rotamers (%)                                       | -                                | -                                | -                                              |
| Ramachandran plot                                       |                                  |                                  |                                                |
| Favored (%)                                             | 95.7                             | 96.5                             | 95.5                                           |
| Allowed (%)                                             | 4.3                              | 3.5                              | 4.5                                            |
| Disallowed (%)                                          | -                                | -                                | -                                              |

X-ray diffraction data were collected on single crystals.

<sup>a</sup> Values in parentheses are for highest-resolution shell.

<sup>b</sup> High *R*<sub>meas</sub> values are the result of a combination of extending the resolution range to include weak data and the presence of a pseudo-merohedral twin fraction of 0.15.

**Supplementary Table S3 | Summary of interactions between PvRBP2b and PvRBP2b human Fab fragments.**

**PvRBP2b and 237235 Fab fragment based on the crystal structure PDB 6WM9**

| PvRBP2b        | Group | Location | 237235<br>V <sub>H</sub> | Group | Distance<br>(Å) | PvRBP2b                                                     | Group   | Location | 237235<br>V <sub>L</sub> | Group   | Distance<br>(Å) |
|----------------|-------|----------|--------------------------|-------|-----------------|-------------------------------------------------------------|---------|----------|--------------------------|---------|-----------------|
| Hydrogen bonds |       |          |                          |       |                 | Hydrogen bonds                                              |         |          |                          |         |                 |
| Asn 174        | ND2   | N-ter    | Asn 106                  | O     | 3.0             | Asn 231                                                     | OD1     | α2       | Thr 101                  | N       | 2.9             |
| Arg 193        | NH2   | β2-α1    | Glu 109                  | O     | 3.5             | Asn 231                                                     | OD1     | α2       | Thr 101                  | OG1     | 3.8             |
| Arg 193        | N     | β2-α1    | Glu 109                  | OE1   | 3.1             | Asn 231                                                     | ND2     | α2       | Thr 101                  | OG1     | 3.5             |
| Arg 193        | NH2   | β2-α1    | Asn 110                  | OD1   | 3.0             | Arg 235                                                     | NH1     | α2       | Phe 36                   | O       | 3.2             |
| Arg 193        | NH1   | β2-α1    | Asn 110                  | OD1   | 3.0             | Gly 238                                                     | O       | α2       | Asn 38                   | ND2     | 2.9             |
| Lys 437        | NZ    | α7       | Tyr 58                   | OH    | 3.1             | Asn 241                                                     | ND2     | α2       | Asn 38                   | O       | 3.2             |
| Lys 437        | NZ    | α7       | Ser 61                   | OG    | 3.8             | Other PvRBP2b interfacing residues (237235 V <sub>H</sub> ) |         |          |                          |         |                 |
| Asp 438        | OD1   | α7       | Tyr 58                   | OH    | 2.6             | Asp 173                                                     | Asp 176 | Gln 191  | Leu 192                  | His 195 | Tyr 200         |
| Asn 441        | ND2   | α7       | Ser 36                   | O     | 3.1             | Asp 203                                                     | Arg 207 | Lys 244  | Lys 248                  | Lys 334 | Asn 444         |
| Lys 445        | NZ    | α7       | Ser 36                   | O     | 2.8             | Ile 448                                                     | His 449 | Lys 452  |                          |         |                 |
| Salt bridges   |       |          |                          |       |                 | Other PvRBP2b interfacing residues (237235 V <sub>L</sub> ) |         |          |                          |         |                 |
| Arg 193        | NE    | β2-α1    | Glu 109                  | OE1   | 3.8             | Thr 171                                                     | Asp 173 | Arg 193  | Pro 194                  | Ile 199 | Tyr 200         |
| Arg 193        | NE    | β2-α1    | Glu 109                  | OE2   | 4.0             | Asp 203                                                     | Asn 227 | Leu 230  | Glu 232                  | Ser 234 | Ile 237         |
| Lys 434        | NZ    | α7       | Asp 62                   | OD2   | 2.8             | Ile 239                                                     | Lys 244 | Asn 245  | Lys 248                  |         |                 |
| Lys 437        | NZ    | α7       | Asp 59                   | OD1   | 3.7             |                                                             |         |          |                          |         |                 |
| Lys 437        | NZ    | α7       | Asp 59                   | OD2   | 3.1             |                                                             |         |          |                          |         |                 |

**PvRBP2b and 241242 Fab fragment based on the crystal structure PDB 6WN1**

| PvRBP2b        | Group | Location | 241242<br>V <sub>H</sub> | Group | Distance<br>(Å) | PvRBP2b                                                     | Group   | Location | 241242<br>V <sub>L</sub> | Group   | Distance<br>(Å) |
|----------------|-------|----------|--------------------------|-------|-----------------|-------------------------------------------------------------|---------|----------|--------------------------|---------|-----------------|
| Hydrogen bonds |       |          |                          |       |                 | Hydrogen bonds                                              |         |          |                          |         |                 |
| Ser 181        | O     | β1       | Arg 35                   | NH1   | 3.1             | Lys 360                                                     | NZ      | α5       | Lys 35                   | O       | 2.5             |
| Asp 182        | O     | β1       | Arg 35                   | NH2   | 2.3             | Lys 363                                                     | NZ      | α5       | Tyr 54                   | O       | 2.5             |
| Lys 278        | NZ    | α3       | Tyr 108                  | OH    | 3.1             | Salt bridges                                                |         |          |                          |         |                 |
| Glu 279        | OE2   | α3       | Asn 36                   | ND2   | 3.8             | Asp 356                                                     | OD2     | α5       | Arg 95                   | NE      | 3               |
| Tyr 351        | OH    | α5       | Tyr 111                  | OH    | 3.0             | Lys 360                                                     | NZ      | α5       | Asp 55                   | OD1     | 3.5             |
| Lys 379        | O     | α6       | Ser 107                  | OG    | 3.6             | Lys 360                                                     | NZ      | α5       | Asp 55                   | OD2     | 2.6             |
| Gly 382        | O     | α6       | Thr 109                  | N     | 3.6             | Other PvRBP2b interfacing residues (241242 V <sub>H</sub> ) |         |          |                          |         |                 |
| Gly 382        | O     | α6       | Thr 109                  | OG1   | 3.4             | Ile 180                                                     | Glu 183 | Ser 184  | Asn 185                  | Tyr 186 | Glu 275         |
| Asp 386        | OD1   | α6       | Ala 58                   | N     | 3.7             | Arg 282                                                     | Lys 348 | Leu 352  | Val 355                  | Asp 356 | Arg 359         |
| Asp 386        | OD2   | α6       | Ser 59                   | N     | 3.4             | Lys 375                                                     | Gln 378 | Tyr 383  | Ile 385                  | Arg 387 | Tyr 390         |
| Asp 386        | OD1   | α6       | Ser 59                   | N     | 3.4             | Gln 393                                                     |         |          |                          |         |                 |
| Asp 386        | O     | α6       | Ser 59                   | OG    | 3.3             | Other PvRBP2b interfacing residues (241242 V <sub>L</sub> ) |         |          |                          |         |                 |
| Asp 386        | OD1   | α6       | Ser 59                   | OG    | 2.8             | Lys 348                                                     | Asn 349 | Leu 352  | Ser 353                  | Val 355 | Arg 359         |
| Glu 389        | OE1   | α6       | Ser 57                   | OG    | 3.3             | Glu 362                                                     |         |          |                          |         |                 |
| Glu 389        | OE1   | α6       | Ala 62                   | N     | 3.8             |                                                             |         |          |                          |         |                 |

**PvRBP2b and 243244 Fab fragment based on the crystal structure PDB 6WNO**

| PvRBP2b        | Group | Location | 243244<br>V <sub>H</sub> | Group | Distance<br>(Å) | PvRBP2b                                                     | Group   | Location | 243244<br>V <sub>L</sub> | Group   | Distance<br>(Å) |
|----------------|-------|----------|--------------------------|-------|-----------------|-------------------------------------------------------------|---------|----------|--------------------------|---------|-----------------|
| Hydrogen bonds |       |          |                          |       |                 | Hydrogen bonds                                              |         |          |                          |         |                 |
| Arg 193        | N     | β2-α1    | Glu 109                  | OE2   | 2.8             | Asn 231                                                     | OD1     | α2       | Thr 101                  | N       | 3.1             |
| Arg 193        | NH2   | β2-α1    | Asn 110                  | OD1   | 2.7             | Arg 235                                                     | NH1     | α2       | Phe 36                   | O       | 3.5             |
| Tyr 200        | OH    | α1       | Asn 62                   | ND2   | 3.8             | Asn 241                                                     | ND2     | α2       | Asn 38                   | O       | 3.1             |
| Lys 437        | O     | α7       | Tyr 58                   | OH    | 3.2             | Other PvRBP2b interfacing residues (243244 V <sub>H</sub> ) |         |          |                          |         |                 |
| Asp 438        | OD1   | α7       | Tyr 58                   | OH    | 2.4             | Asp 173                                                     | Asn 174 | Asp 176  | Gln 191                  | Leu 192 | HIS 195         |
| Asn 441        | ND2   | α7       | Ser 36                   | O     | 3.1             | Asp 203                                                     | Lys 334 | Tyr 430  |                          |         |                 |
| Lys 445        | NZ    | α7       | Ser 36                   | O     | 3.5             | Other PvRBP2b interfacing residues (243244 V <sub>L</sub> ) |         |          |                          |         |                 |
| Salt bridges   |       |          |                          |       |                 | Thr 171                                                     | Asp 173 | Arg 193  | Pro 194                  | HIS 195 | Ile 199         |
| Arg 193        | NH2   | β2-α1    | Glu 109                  | OE2   | 3.9             | Tyr 200                                                     | Asp 203 | Asn 227  | Leu 230                  | Glu 232 | Ser 234         |
| Lys 437        | NZ    | α7       | Asp 59                   | OD2   | 3.7             | Ile 237                                                     | Gly 238 | Ile 239  | Lys 244                  | Asn 245 |                 |
| Lys 437        | NZ    | α7       | Asp 61                   | OD2   | 3.5             |                                                             |         |          |                          |         |                 |

**Supplementary Table S3 | continued**

**PvRBP2b and 251249 Fab fragment based on the crystal structure PDB 6WOZ**

| PvRBP2b        | Group | Location | 251249<br>V <sub>H</sub> | Group | Distance<br>(Å) | PvRBP2b                                                     | Group   | Location | 251249<br>V <sub>L</sub> | Group   | Distance<br>(Å) |
|----------------|-------|----------|--------------------------|-------|-----------------|-------------------------------------------------------------|---------|----------|--------------------------|---------|-----------------|
| Hydrogen bonds |       |          |                          |       |                 | Hydrogen bonds                                              |         |          |                          |         |                 |
| Tyr 186        | OH    | β1-β2    | Gly 109                  | N     | 3.6             | Glu 308                                                     | OE2     | α3       | Thr 36                   | OG1     | 3.1             |
| Tyr 186        | OH    | β1-β2    | Gly 109                  | O     | 2.8             | Salt bridges                                                |         |          |                          |         |                 |
| Arg 290        | NH1   | α3       | Tyr 59                   | OH    | 3.5             | Asp 305                                                     | OD1     | α3       | Arg 96                   | NH1     | 3.6             |
| Lys 291        | NZ    | α3       | Tyr 59                   | O     | 3.3             | Asp 305                                                     | OD1     | α3       | Arg 96                   | NH2     | 2.9             |
| Lys 291        | NZ    | α3       | Ser 60                   | O     | 3.7             | Asp 305                                                     | OD2     | α3       | Arg 96                   | NH1     | 3.3             |
| Asp 294        | OD2   | α3       | Thr 57                   | OG1   | 2.7             | Other PvRBP2b interfacing residues (251249 V <sub>H</sub> ) |         |          |                          |         |                 |
| Asp 294        | OD2   | α3       | Gly 58                   | N     | 3.4             | Asp 182                                                     | Glu 183 | Ser 184  | Tyr 187                  | Asn 198 | PHE 201         |
| Asp 294        | OD2   | α3       | Tyr 59                   | N     | 2.7             | Leu 293                                                     | Glu 421 | PHE 424  | Asn 425                  | Tyr 429 |                 |
| Asp 294        | OD2   | α3       | Ser 60                   | N     | 3.7             | Other PvRBP2b interfacing residues (251249 V <sub>L</sub> ) |         |          |                          |         |                 |
| Asp 294        | OD2   | α3       | Ser 61                   | N     | 3.4             | Arg 304                                                     | Asn 417 |          |                          |         |                 |
| Gln 295        | NE2   | α3       | Ser 61                   | OG    | 2.8             |                                                             |         |          |                          |         |                 |
| Gln 295        | NE2   | α3       | Glu 62                   | OE2   | 3.7             |                                                             |         |          |                          |         |                 |
| Lys 297        | NZ    | α3       | Ser 36                   | O     | 3.3             |                                                             |         |          |                          |         |                 |
| Lys 297        | NZ    | α3       | Ser 38                   | OG    | 3.8             |                                                             |         |          |                          |         |                 |
| Asn 300        | ND2   | α3       | Ile 112                  | O     | 3.2             |                                                             |         |          |                          |         |                 |
| Asn 301        | OD1   | α3       | Asp 114                  | N     | 2.6             |                                                             |         |          |                          |         |                 |
| Arg 304        | NH1   | α3       | Asp 114                  | O     | 2.8             |                                                             |         |          |                          |         |                 |
| Asn 428        | ND2   | α7       | Val 110                  | O     | 3.7             |                                                             |         |          |                          |         |                 |
| Salt bridges   |       |          |                          |       |                 |                                                             |         |          |                          |         |                 |
| Lys 298        | NZ    | α3       | Glu 62                   | OE1   | 3.7             |                                                             |         |          |                          |         |                 |
| Lys 298        | NZ    | α3       | Glu 62                   | OE2   | 2.6             |                                                             |         |          |                          |         |                 |

**PvRBP2b and 253245 Fab fragment based on the crystal structure PDB 6WTY<sup>a</sup>**

| PvRBP2b        | Group | Location | 253245<br>V <sub>H</sub> | Group | Distance<br>(Å) | PvRBP2b                                                     | Group   | Location | 253245<br>V <sub>L</sub> | Group   | Distance<br>(Å) |
|----------------|-------|----------|--------------------------|-------|-----------------|-------------------------------------------------------------|---------|----------|--------------------------|---------|-----------------|
| Hydrogen bonds |       |          |                          |       |                 | Hydrogen bonds                                              |         |          |                          |         |                 |
| Gln 393        | NE2   | α6       | Ser 112                  | O     | 3.1             | None                                                        |         |          |                          |         |                 |
| Salt Bridges   |       |          |                          |       |                 | Other PvRBP2b interfacing residues (253245 V <sub>H</sub> ) |         |          |                          |         |                 |
| Asp 386        | OD1   | α6       | Arg 114                  | NH2   | 3.5             | Asp 341                                                     | Ile 344 | Lys 345  | Lys 348                  | Asn 349 | Tyr 351         |
| Glu 389        | OE1   | α6       | Arg 114                  | NH2   | 2.5             | Leu 352                                                     | Val 355 | Asp 356  | Lys 379                  | Gly 382 | Ile 385         |
| Glu 389        | OE2   | α6       | Arg 114                  | NH2   | 3.1             | Asp 386                                                     | Glu 389 | Leu 392  | Gln 393                  |         |                 |
|                |       |          |                          |       |                 | Other PvRBP2b interfacing residues (253245 V <sub>L</sub> ) |         |          |                          |         |                 |
|                |       |          |                          |       |                 | Ser 184                                                     | Asn 185 | Tyr 186  | Asp 386                  | Arg 387 | Tyr 390         |
|                |       |          |                          |       |                 | Gln 393                                                     | Lys 394 | Lys 396  | His 397                  | Asp 400 | Gln 401         |
|                |       |          |                          |       |                 | Ala 404                                                     | Tyr 422 | Asn 425  | Asn 428                  | Tyr 429 |                 |

**PvRBP2b and 258259 Fab fragment based on the crystal structure PDB 6WTV**

| PvRBP2b        | Group | Location | 258259<br>V <sub>H</sub> | Group | Distance<br>(Å) | PvRBP2b                                                     | Group   | Location | 258259<br>V <sub>L</sub> | Group   | Distance<br>(Å) |
|----------------|-------|----------|--------------------------|-------|-----------------|-------------------------------------------------------------|---------|----------|--------------------------|---------|-----------------|
| Hydrogen bonds |       |          |                          |       |                 | Hydrogen bonds                                              |         |          |                          |         |                 |
| Glu 183        | O     | β1-β2    | Ser 80                   | OG    | 3.1             | Asp 356                                                     | OD1     | α5       | Thr 36                   | OG1     | 3.1             |
| Asn 185        | N     | β1-β2    | Ser 80                   | OG    | 3.8             | Asp 356                                                     | OD2     | α5       | Thr 36                   | N       | 3.7             |
| Lys 348        | NZ    | α5       | Ser 62                   | OG    | 3.2             | Other PvRBP2b interfacing residues (258259 V <sub>H</sub> ) |         |          |                          |         |                 |
| Lys 348        | NZ    | α5       | Tyr 64                   | OH    | 2.3             | Ser 184                                                     | Lys 278 | Leu 352  | Ser 353                  | Val 355 | Gly 382         |
| Tyr 351        | OH    | α5       | Tyr 108                  | O     | 2.7             | Tyr 383                                                     | Ile 385 | Arg 387  | Glu 389                  | Tyr 390 | Gln 393         |
| Arg 359        | NH1   | α5       | HIS 112                  | O     | 2.5             | Other PvRBP2b interfacing residues (258259 V <sub>L</sub> ) |         |          |                          |         |                 |
| Asp 386        | OD1   | α6       | Gly 58                   | N     | 3.6             | Lys 348                                                     | Asn 349 | Leu 352  | Arg 359                  | Lys 360 |                 |
| Asp 386        | OD1   | α6       | Ser 59                   | N     | 3.1             |                                                             |         |          |                          |         |                 |
| Asp 386        | OD2   | α6       | Ser 59                   | N     | 3.2             |                                                             |         |          |                          |         |                 |
| Asp 386        | O     | α6       | Ser 59                   | OG    | 2.5             |                                                             |         |          |                          |         |                 |
| Asp 386        | OD1   | α6       | Ser 59                   | OG    | 2.6             |                                                             |         |          |                          |         |                 |
| Salt bridges   |       |          |                          |       |                 |                                                             |         |          |                          |         |                 |
| Asp 356        | OD1   | α5       | HIS 112                  | NE2   | 3.5             |                                                             |         |          |                          |         |                 |
| Asp 356        | OD2   | α5       | HIS 112                  | NE2   | 3.6             |                                                             |         |          |                          |         |                 |
| Lys 379        | NZ    | α6       | Glu 107                  | OE2   | 3.9             |                                                             |         |          |                          |         |                 |

**Supplementary Table S3 | continued**

**PvRBP2b and 273264 Fab fragment based on the crystal structure PDB 6WTU**

| PvRBP2b                                                     | Group | Location | 273264<br>V <sub>H</sub> | Group | Distance<br>(Å) | PvRBP2b                                                     | Group   | Location | 273264<br>V <sub>L</sub> | Group   | Distance<br>(Å) |
|-------------------------------------------------------------|-------|----------|--------------------------|-------|-----------------|-------------------------------------------------------------|---------|----------|--------------------------|---------|-----------------|
| Hydrogen bonds                                              |       |          |                          |       |                 | Hydrogen bonds                                              |         |          |                          |         |                 |
| Tyr 351                                                     | OH    | α5       | Tyr 108                  | O     | 2.6             | Asp 356                                                     | OD2     | α5       | Thr 35                   | OG1     | 3.0             |
| Arg 359                                                     | NH2   | α5       | HIS 112                  | O     | 2.5             | Asp 356                                                     | OD1     | α5       | Ser 36                   | N       | 3.6             |
| Asp 386                                                     | OD1   | α6       | Gly 58                   | N     | 3.8             | Asp 356                                                     | OD1     | α5       | Ser 36                   | OG      | 2.4             |
| Asp 386                                                     | OD1   | α6       | Ser 59                   | N     | 3.3             | Asp 356                                                     | OD2     | α5       | Ser 36                   | N       | 3.4             |
| Asp 386                                                     | OD2   | α6       | Ser 59                   | N     | 3.5             | Lys 360                                                     | NZ      | α5       | Thr 35                   | O       | 2.6             |
| Asp 386                                                     | OD1   | α6       | Ser 59                   | OG    | 3.1             | Salt bridges                                                |         |          |                          |         |                 |
| Asp 386                                                     | O     | α6       | Ser 59                   | OG    | 3.0             | Lys 360                                                     | NZ      | α5       | Asp 55                   | OD1     | 3.5             |
| Glu 389                                                     | OE1   | α6       | Ser 62                   | OG    | 2.7             | Lys 360                                                     | NZ      | α5       | Asp 55                   | OD2     | 2.5             |
| Gln 393                                                     | NE2   | α6       | Gly 60                   | O     | 3.4             | Other PvRBP2b interfacing residues (273264 V <sub>H</sub> ) |         |          |                          |         |                 |
| Salt bridges                                                |       |          |                          |       |                 | Glu 183                                                     | Ser 184 | Asn 185  | Lys 348                  | Leu 352 | Ser 353         |
| Asp 356                                                     | OD2   | α5       | HIS 112                  | NE2   | 3.8             | Val 355                                                     | Lys 379 | Gly 382  | Tyr 383                  | Ile 385 | Arg 387         |
| Other PvRBP2b interfacing residues (273264 V <sub>L</sub> ) |       |          |                          |       |                 | Tyr 390                                                     |         |          |                          |         |                 |
| Other PvRBP2b interfacing residues (273264 V <sub>L</sub> ) |       |          |                          |       |                 | Asn 349                                                     | Leu 352 | Arg 359  |                          |         |                 |

**PvRBP2b and 283284 Fab fragment based on the crystal structure PDB 6WQO**

| PvRBP2b                                                     | Group | Location | 283284<br>V <sub>H</sub> | Group | Distance<br>(Å) | PvRBP2b                                                     | Group   | Location | 283284<br>V <sub>L</sub> | Group   | Distance<br>(Å) |
|-------------------------------------------------------------|-------|----------|--------------------------|-------|-----------------|-------------------------------------------------------------|---------|----------|--------------------------|---------|-----------------|
| Hydrogen bonds                                              |       |          |                          |       |                 | Hydrogen bonds                                              |         |          |                          |         |                 |
| Tyr 211                                                     | O     | α1       | Ser 35                   | OG    | 2.3             | Lys 326                                                     | NZ      | α4       | Ser 61                   | OG      | 3.8             |
| Tyr 211                                                     | OH    | α1       | Ile 104                  | O     | 3.2             | Lys 333                                                     | NZ      | α4       | Asp 55                   | O       | 3.1             |
| Asn 319                                                     | ND2   | α4       | Tyr 37                   | OH    | 3.6             | Salt bridges                                                |         |          |                          |         |                 |
| Asp 323                                                     | OD2   | α4       | Tyr 37                   | OH    | 2.8             | Lys 326                                                     | NZ      | α4       | Glu 60                   | OE1     | 3.7             |
| Asp 331                                                     | OD1   | α4       | Tyr 108                  | OH    | 2.5             | Lys 326                                                     | NZ      | α4       | Glu 60                   | OE2     | 3.5             |
| Salt bridges                                                |       |          |                          |       |                 | Lys 333                                                     | NZ      | α4       | Asp 55                   | OD2     | 2.5             |
| Lys 216                                                     | NZ    | α2       | Asp 58                   | OD2   | 2.4             | Other PvRBP2b interfacing residues (283284 V <sub>H</sub> ) |         |          |                          |         |                 |
| Asp 323                                                     | OD2   | α4       | Lys 102                  | NZ    | 2.8             | Arg 207                                                     | Ser 210 | HIS 212  | Thr 213                  | Gln 317 | Val 320         |
| Asp 323                                                     | OD1   | α4       | Lys 102                  | NZ    | 4.0             | Met 324                                                     | Lys 326 | Ile 327  | Val 330                  | Lys 412 |                 |
| Other PvRBP2b interfacing residues (283284 V <sub>L</sub> ) |       |          |                          |       |                 | Val 330                                                     | Lys 334 | Lys 410  |                          |         |                 |

The distance measurements are based on molecules A, B and C.

Interacting and interfacing residues between PvRBP2b and antibody Fabs was determined using PISA<sup>35</sup>.

<sup>a</sup> Some residue side chains are unresolved and the interactions listed here may not be complete.
